# Supplementary material for: A human model of Batten disease shows role of CLN3 in phagocytosis at the photoreceptor–RPE interface
Source: PubMed Central journal article supplement (PMC7864947; doi:10.1038/s42003-021-01682-5), 2021-02-05
Supplement: 42003_2021_1682_MOESM3_ESM.pdf [file 42003_2021_1682_MOESM3_ESM.pdf]

## Description of Additional Supplementary Items

File Name: Supplementary Data 1

Description: Raw data for all main and supplementary figures
