# Supplementary material for: A human model of Batten disease shows role of CLN3 in phagocytosis at the photoreceptor–RPE interface
Source: PubMed Central journal article supplement (PMC7864947; doi:10.1038/s42003-021-01682-5), 2021-02-05
Supplement: 42003_2021_1682_MOESM5_ESM.pdf [file 42003_2021_1682_MOESM5_ESM.pdf]

## Reporting Summary

Nature Research wishes to improve the reproducibility of the work that we publish. This form provides structure for consistency and transparency in reporting. For further information on Nature Research policies, see [Authors & Referees](#) and the [Editorial Policy Checklist](#).

### Statistics

For all statistical analyses, confirm that the following items are present in the figure legend, table legend, main text, or Methods section.

n/a Confirmed

- The exact sample size ( $n$ ) for each experimental group/condition, given as a discrete number and unit of measurement
- A statement on whether measurements were taken from distinct samples or whether the same sample was measured repeatedly
- The statistical test(s) used AND whether they are one- or two-sided  
*Only common tests should be described solely by name; describe more complex techniques in the Methods section.*
- A description of all covariates tested
- A description of any assumptions or corrections, such as tests of normality and adjustment for multiple comparisons
- A full description of the statistical parameters including central tendency (e.g. means) or other basic estimates (e.g. regression coefficient) AND variation (e.g. standard deviation) or associated estimates of uncertainty (e.g. confidence intervals)
- For null hypothesis testing, the test statistic (e.g.  $F$ ,  $t$ ,  $r$ ) with confidence intervals, effect sizes, degrees of freedom and  $P$  value noted  
*Give  $P$  values as exact values whenever suitable.*
- For Bayesian analysis, information on the choice of priors and Markov chain Monte Carlo settings
- For hierarchical and complex designs, identification of the appropriate level for tests and full reporting of outcomes
- Estimates of effect sizes (e.g. Cohen's  $d$ , Pearson's  $r$ ), indicating how they were calculated

*Our web collection on [statistics for biologists](#) contains articles on many of the points above.*

### Software and code

Policy information about [availability of computer code](#)

Data collection

Data analysis

For manuscripts utilizing custom algorithms or software that are central to the research but not yet described in published literature, software must be made available to editors/reviewers. We strongly encourage code deposition in a community repository (e.g. GitHub). See the Nature Research [guidelines for submitting code & software](#) for further information.

### Data

Policy information about [availability of data](#)

All manuscripts must include a [data availability statement](#). This statement should provide the following information, where applicable:

- Accession codes, unique identifiers, or web links for publicly available datasets
- A list of figures that have associated raw data
- A description of any restrictions on data availability

Data availability statement: Source data for main and supplementary figures is provided in a supplementary data file. Inquiry of any additional data should be requested to the corresponding author.

### Field-specific reporting

Please select the one below that is the best fit for your research. If you are not sure, read the appropriate sections before making your selection.

- Life sciences       Behavioural & social sciences       Ecological, evolutionary & environmental sciences

## Life sciences study design

All studies must disclose on these points even when the disclosure is negative.

|                 |                                                                                                                                                                                                                                                                                                                                                                                                                          |
|-----------------|--------------------------------------------------------------------------------------------------------------------------------------------------------------------------------------------------------------------------------------------------------------------------------------------------------------------------------------------------------------------------------------------------------------------------|
| Sample size     | All hiPSC-RPE experiments used up to three distinct control lines and always included two distinct CLN3 disease lines with $n \geq 3$ for each individual experiment. In addition, two distinct clones per CLN3 disease hiPSC lines were utilized for experimental analysis. In each experiment, data from all control lines and CLN3 disease lines were grouped together and used in control vs. CLN3 disease analyses. |
| Data exclusions | Data was only excluded for failed experiments due to technical issues- for example antibody staining did not work and had to be repeated on the same sample                                                                                                                                                                                                                                                              |
| Replication     | $n \geq 3$ for each individual experiment from independent hiPSC differentiation runs. In addition, two distinct clones per CLN3 disease hiPSC lines were utilized for experimental analysis                                                                                                                                                                                                                             |
| Randomization   | Data not randomized, as data compared control vs. CLN3 disease samples from human subjects and hiPSC-derived tissue                                                                                                                                                                                                                                                                                                      |
| Blinding        | Analysis of a subset of experiments, where experimenter bias could play a role (specifically analyses of electron microscopy data and quantification of bound vs. internalized POS and autofluorescent material accumulation in control vs. hiPSC-RPE) was carried out/confirmed in blinded analyses by investigators that did not perform data collection.                                                              |

## Reporting for specific materials, systems and methods

We require information from authors about some types of materials, experimental systems and methods used in many studies. Here, indicate whether each material, system or method listed is relevant to your study. If you are not sure if a list item applies to your research, read the appropriate section before selecting a response.

### Materials & experimental systems

| n/a                                 | Involvement in the study                                        |
|-------------------------------------|-----------------------------------------------------------------|
| <input type="checkbox"/>            | <input checked="" type="checkbox"/> Antibodies                  |
| <input type="checkbox"/>            | <input checked="" type="checkbox"/> Eukaryotic cell lines       |
| <input checked="" type="checkbox"/> | <input type="checkbox"/> Palaeontology                          |
| <input type="checkbox"/>            | <input checked="" type="checkbox"/> Animals and other organisms |
| <input type="checkbox"/>            | <input checked="" type="checkbox"/> Human research participants |
| <input checked="" type="checkbox"/> | <input type="checkbox"/> Clinical data                          |

### Methods

| n/a                                 | Involvement in the study                        |
|-------------------------------------|-------------------------------------------------|
| <input checked="" type="checkbox"/> | <input type="checkbox"/> ChIP-seq               |
| <input checked="" type="checkbox"/> | <input type="checkbox"/> Flow cytometry         |
| <input checked="" type="checkbox"/> | <input type="checkbox"/> MRI-based neuroimaging |

## Antibodies

### Antibodies used

BEST1 (Millipore) Cat# MAB5466  
 CRALBP (Abcam), Cat#ab15051  
 ITGA5 (Santa Cruz Biotechnology), Cat#sc-376199  
 ITGB5 (Abcam), Cat# ab184312  
 MERTK (Abcam), Cat# ab52968  
 RHO (Millipore) Cat#MABN15  
 RPE65 (Millipore) Cat#MAB5428  
 CLN3, (Santa Cruz Biotechnology), Cat# sc-398192  
 CLN3 Blocking Peptide, (Santa Cruz Biotechnology), Cat# sc-398192P  
 EZR (Cell Signaling), Cat# 3145S  
 FLAG (Sigma), Cat# F3165  
 MYC (Cell Signaling), Cat# 2276S  
 GFP (Novus), Cat# NB600-308  
 OCT3/4 (Santa Cruz Biotechnology), Cat# sc-5279  
 NANOG (R&D systems), Cat# AF1997  
 LAMININ (Abcam), Cat# ab210956  
 LAMP1 (Abcam), Cat# ab24170  
 ZO-1 (Life Technologies), Cat# 61-7300  
 ACTIN (Santa Cruz Biotechnology) Cat# sc-47778

Alexa-Fluor 488 (Life Technologies), Cat# A21202  
 Alexa-Fluor 488 (Life Technologies), Cat# A21206  
 Alexa-Fluor 546 (Life Technologies) Cat# A10040  
 Alexa-Fluor 546 (Life Technologies) Cat# A10036

Alexa-Fluor 633 Phalloidin (Life Technologies) Cat# A22284  
 HRP Secondary (Azure) goat anti-mouse, Cat# AC2115  
 HRP Secondary (Azure) goat anti-rabbit, Cat# AC2114

## Validation

When applicable for WB, ICC and IHC analysis of primary antibody, by the manufacturer, prior publications in reputed journals and experiments in the laboratory to confirm expected tissue-specific localization in primary tissue and hiPSC-derived target cells. Of note, a subset of primary antibodies, that were essential for data validity, RHO and FLAG, analysis on used application (WB/ICC) was performed on positive vs. negative tissue/cell samples to confirm antibody specificity. Also, when applicable, the specificity of primary (CLN3) and secondary antibodies was similarly determined by evaluating specificity of staining in the presence and absence of primary antibody.

## Eukaryotic cell lines

Policy information about [cell lines](#)

Cell line source(s)

293FT Thermo Fisher

Authentication

Used for lentivirus production and the viruses were transduced on human iPSC derived RPE cells

Mycoplasma contamination

Cell line not tested for mycoplasma contamination

Commonly misidentified lines  
(See [ICLAC](#) register)

No misidentified cells were used in the study

## Animals and other organisms

Policy information about [studies involving animals](#); [ARRIVE guidelines](#) recommended for reporting animal research

Laboratory animals

laboratory animal tissue (mice) were only used to confirm CLN3 localization in RPE cells. Whole eyes from wild-type and CLN3<sup>-/-</sup> (CLN3<sup>Δex1-6</sup>) mice were from animals raised at Sanford research. All mice were cared for in accordance to animal protocols approved by Sanford Research's IACUC and in accordance with guidelines set forth by the NIH and AAALAC.

Wild animals

No wild animals were included in the study

Field-collected samples

No field-collected samples were included in the study

Ethics oversight

Sanford Research's IACUC

Note that full information on the approval of the study protocol must also be provided in the manuscript.

## Human research participants

Policy information about [studies involving human research participants](#)

Population characteristics

Children aged 7 and 8 diagnosed with CLN3 disease

Recruitment

Not applicable--children diagnosed with CLN3 disease

Ethics oversight

University of Rochester Institutional Regulatory Board Protocol

Note that full information on the approval of the study protocol must also be provided in the manuscript.
